# Supplementary material for: Screening of Antibacterial Activity of Some Resupinate Fungi, Reveal Gloeocystidiellum lojanense sp. nov. (Russulales) against E. coli from Ecuador
Source: MDPI journal article supplement (doi:10.3390/jof9010054), 2022-12-29
Supplement: s1 [file s1]

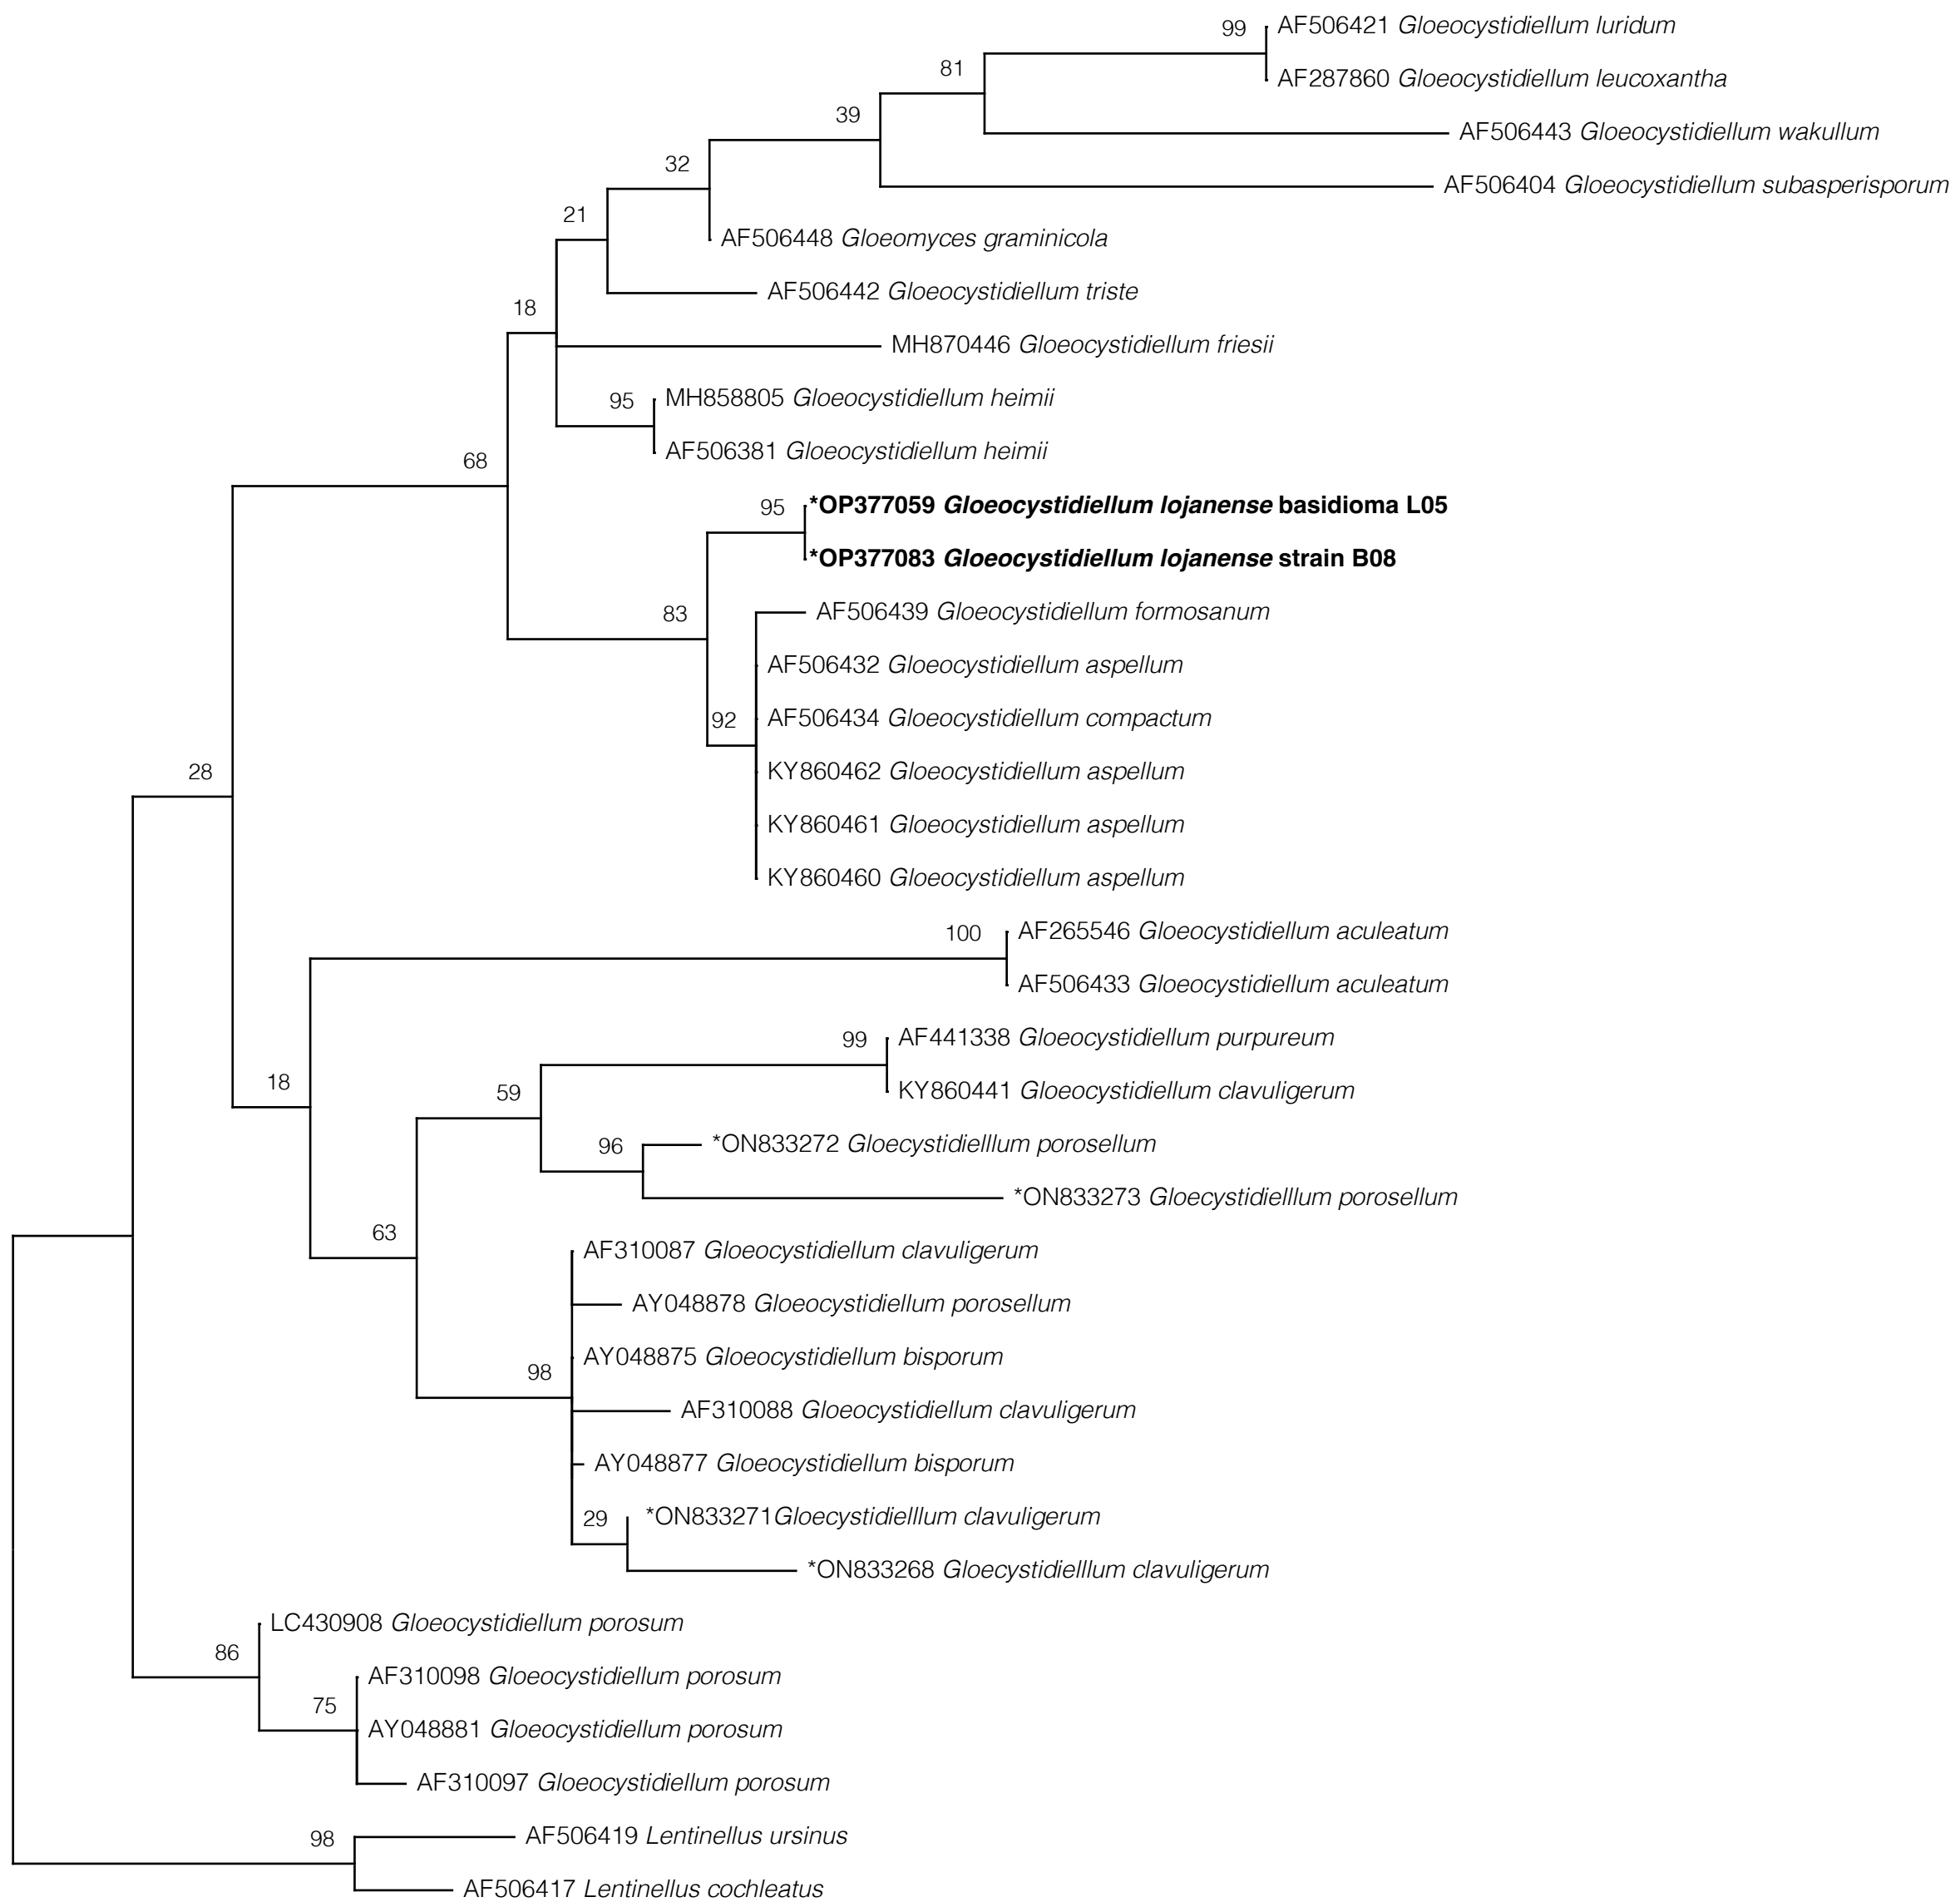

0.01

Figure S3: Maximum likelihood phylogenetic tree for the LSU region for sequence positioning corresponding to *Gloecystidiellum lojanense* sp. nov. Bar = number of expected substitutions per position. \* Sequences generated in this study.
