# Supplementary material for: Screening of Antibacterial Activity of Some Resupinate Fungi, Reveal Gloeocystidiellum lojanense sp. nov. (Russulales) against E. coli from Ecuador
Source: MDPI journal article supplement (doi:10.3390/jof9010054), 2022-12-29
Supplement: s1 [file s1]

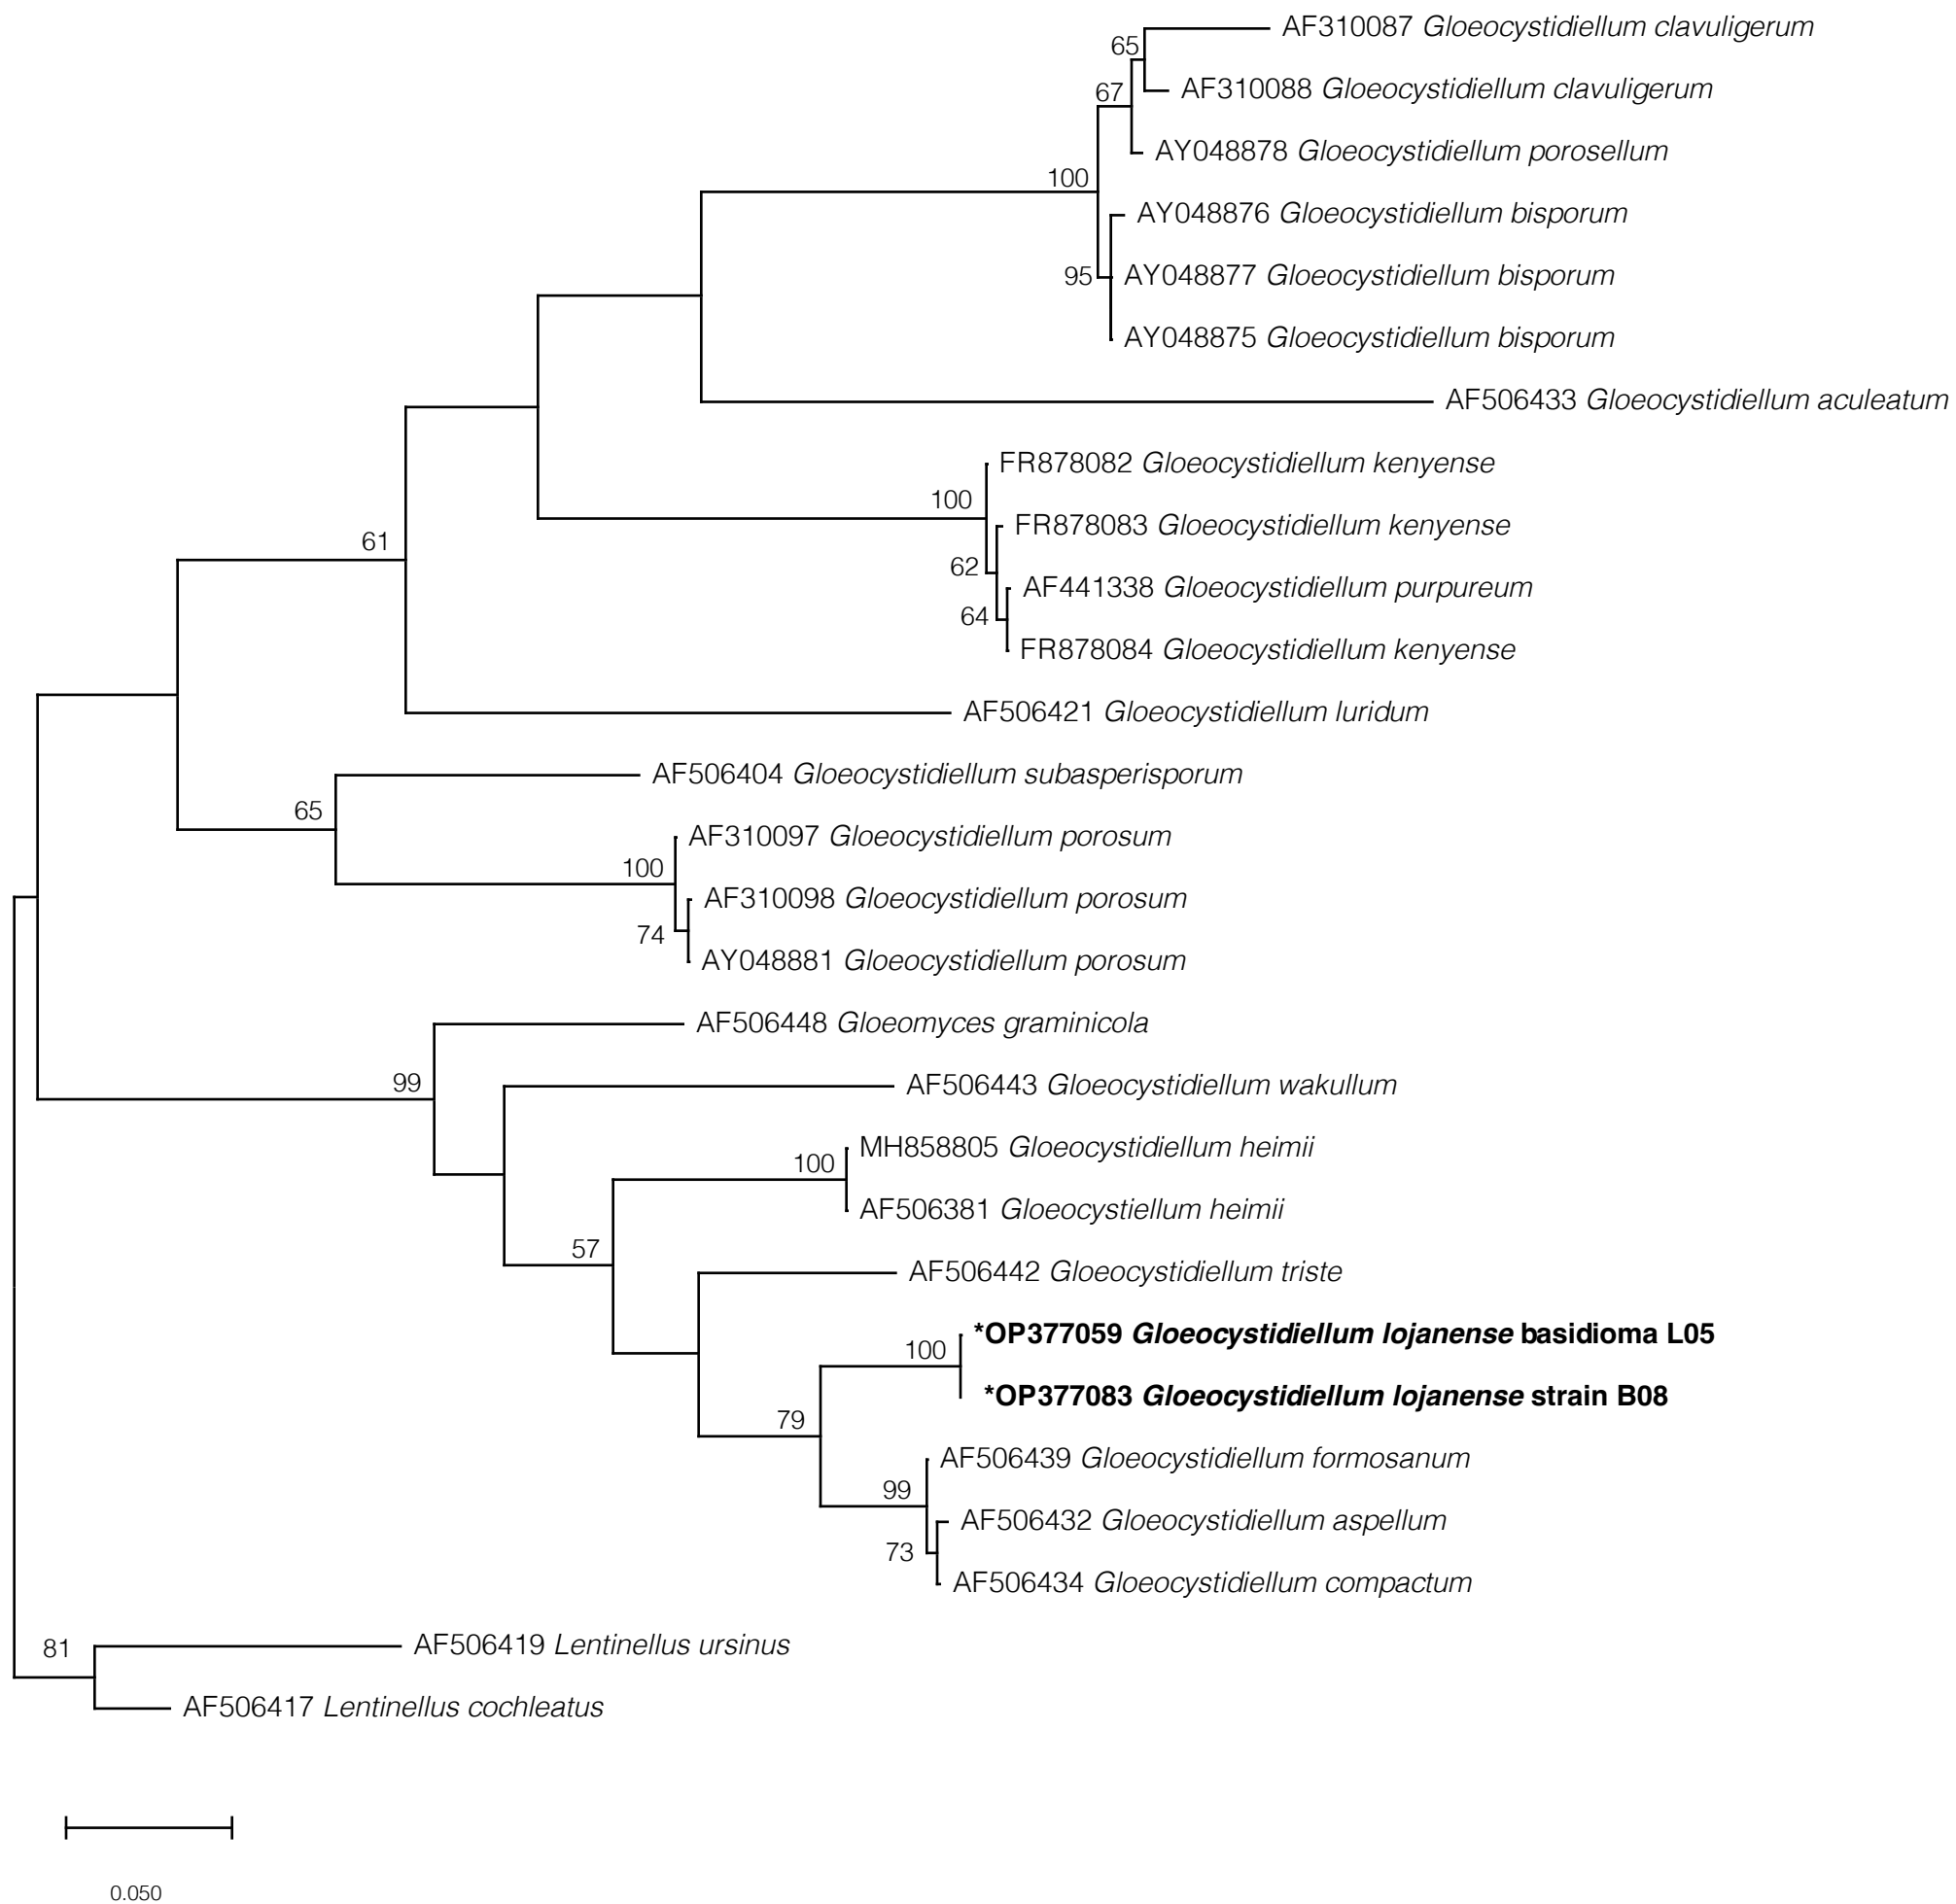

Figure S2: Maximum Likelihood phylogenetic tree for the ITS1-5.8-ITS2 region for sequence po-sitioning corresponding to *Gloecystidiellum lojanense* sp. nov. Bar = number of expected substitu-tions per position. \* Sequences generated in this study.
