# Supplementary figures and images for: Screening of Antibacterial Activity of Some Resupinate Fungi, Reveal Gloeocystidiellum lojanense sp. nov. (Russulales) against E. coli from Ecuador
Source: MDPI journal article supplement (doi:10.3390/jof9010054), 2022-12-29

# Antibacterial activity assay

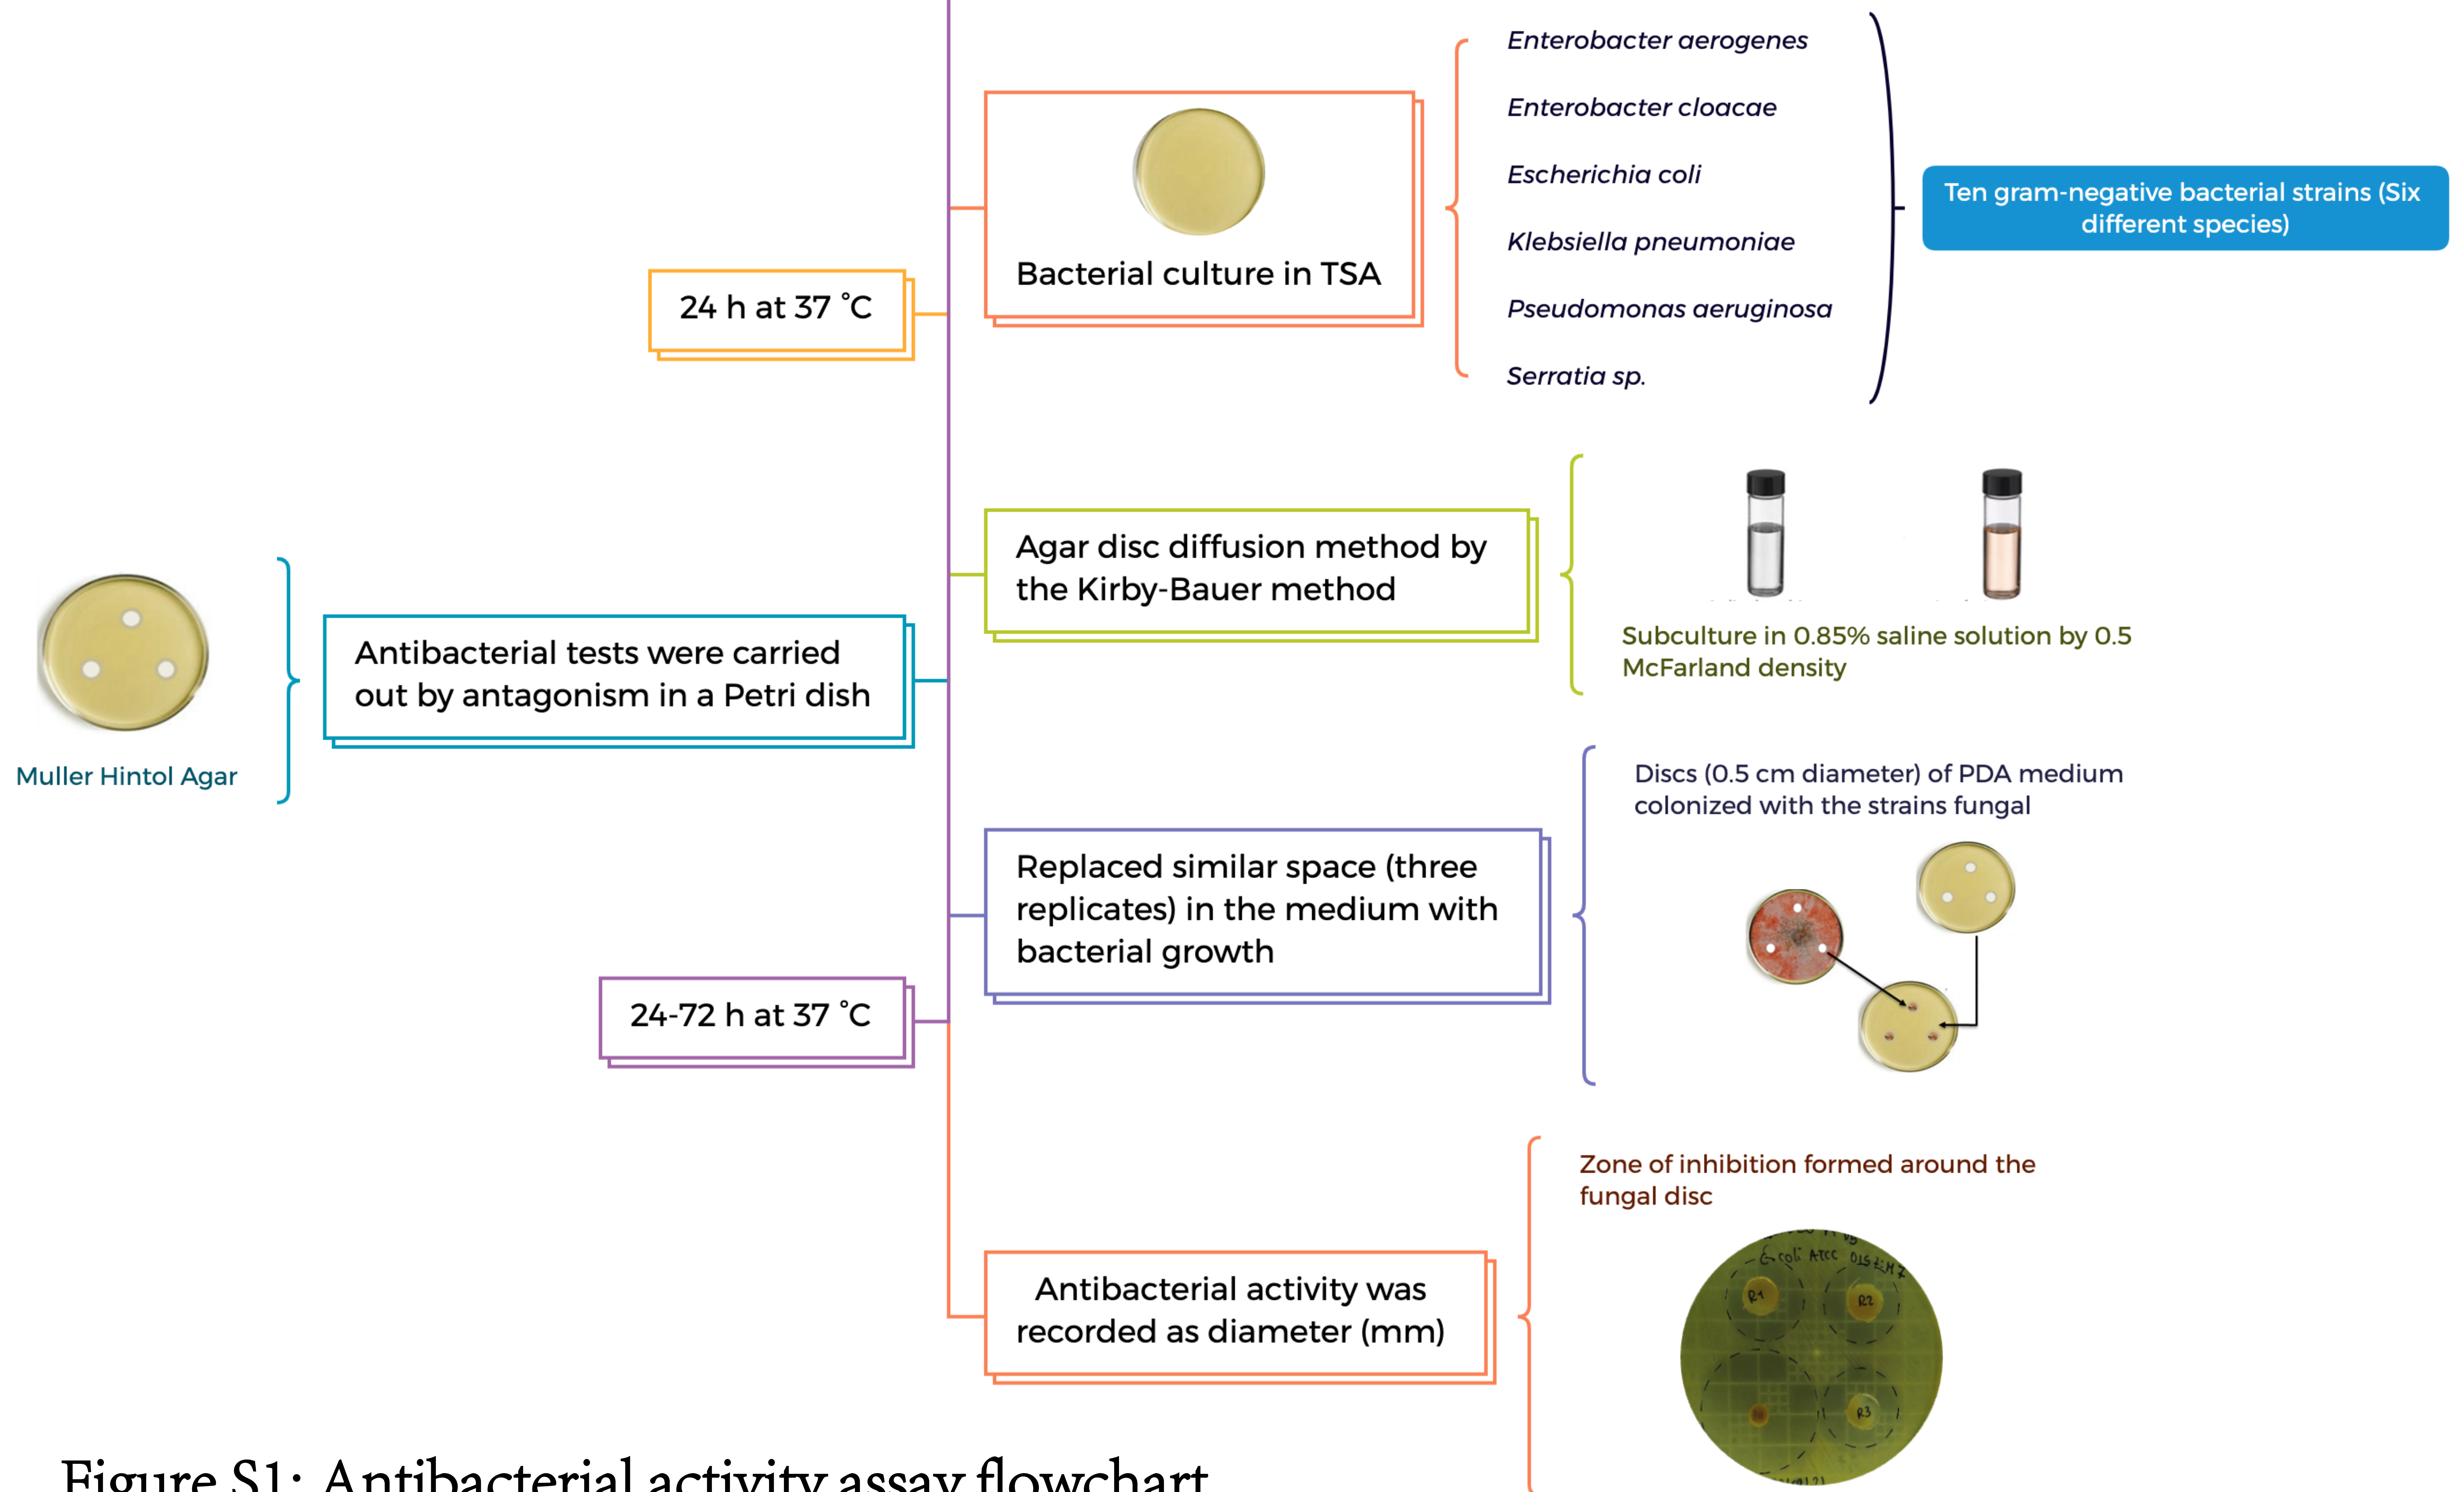

Figure S1: Antibacterial activity assay flowchart.

Supplement: s1 [file s1]
